# Supplementary material
Source: PubMed Central journal article supplement (PMC6437480)
Supplement: AAC.02310-18-s0001.pdf [file AAC.02310-18-s0001.pdf]

## Supplementary data

### **Bacterial Cytological Profiling (BCP) as a tool to study mechanism of action of antibiotics that are active against *Acinetobacter baumannii***

Htut Htut Htoo<sup>a</sup>, Lauren Brumage<sup>b</sup>, Vorrapon Chaikerasak<sup>c</sup>, Hannah Tsunemoto<sup>b</sup>, Joseph Sugie<sup>b</sup>, Chanwit Tribuddharat<sup>d</sup>, Joe Pogliano<sup>b</sup>, Poochit Nonejuie<sup>a#</sup>

<sup>a</sup> Institute of Molecular Biosciences, Mahidol University, Nakhon Pathom, Thailand

<sup>b</sup> Division of Biological Sciences, University of California, San Diego, La Jolla, California, USA

<sup>c</sup> Department of Biochemistry, Faculty of Science, Chulalongkorn University, Bangkok, Thailand

<sup>d</sup> Department of Microbiology, Faculty of Medicine Siriraj Hospital, Mahidol University, Bangkok, Thailand

Running title: BCP for *A. baumannii* antibiotic research

#Address correspondence to Poochit Nonejuie, [poochit.non@mahidol.edu](mailto:poochit.non@mahidol.edu).

24

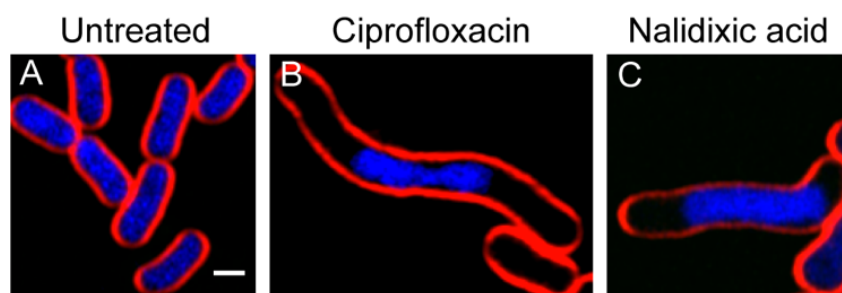

25

26

27 **FIG S1 Cytological profile of DNA synthesis inhibitors in *A. baumannii* ATCC 19606**  
28 **cells.**

29 (A) Untreated cells. Bacterial cells were treated with 2x MIC of (B) ciprofloxacin and (C)  
30 nalidixic acid for 2 hours and then stained with FM4-64 (red) and DAPI (blue). Scale bar  
31 represents 1  $\mu\text{m}$ .

32

33

34

35

36

37

38

39

40

41

42

43

44

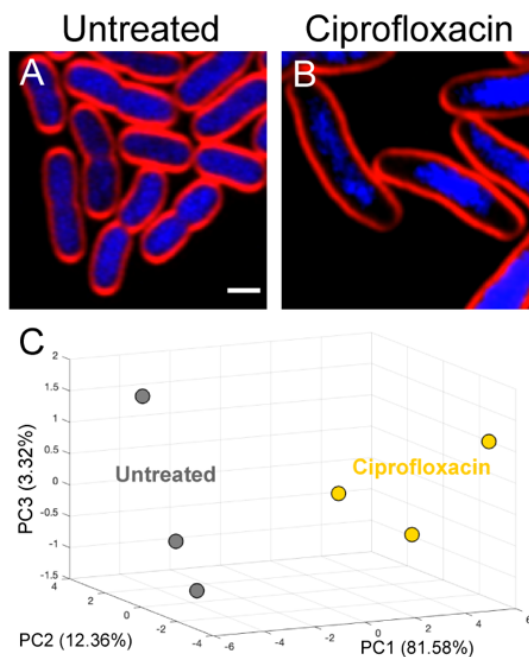

45

46

47 **FIG S2 Cytological profiling of DNA synthesis inhibitor, ciprofloxacin, in *A. baumannii***

48 **ATCC 17978 cells.**

49 (A) Untreated cells, scale bar represents 1  $\mu\text{m}$ . (B) Bacterial cells were treated with 2x MIC of

50 ciprofloxacin for 2 hours and then stained with FM4-64 (red) and DAPI (blue). (C) PCA graph

51 of untreated and ciprofloxacin-treated *A. baumannii* ATCC 17978 cells, made by using PC1

52 (81.58%), PC2 (12.36%) and PC3 (3.32%), showing Ciprofloxacin-treated cells in distinct

53 group from untreated cells.

54

55

56

57

58

59

60

61

62

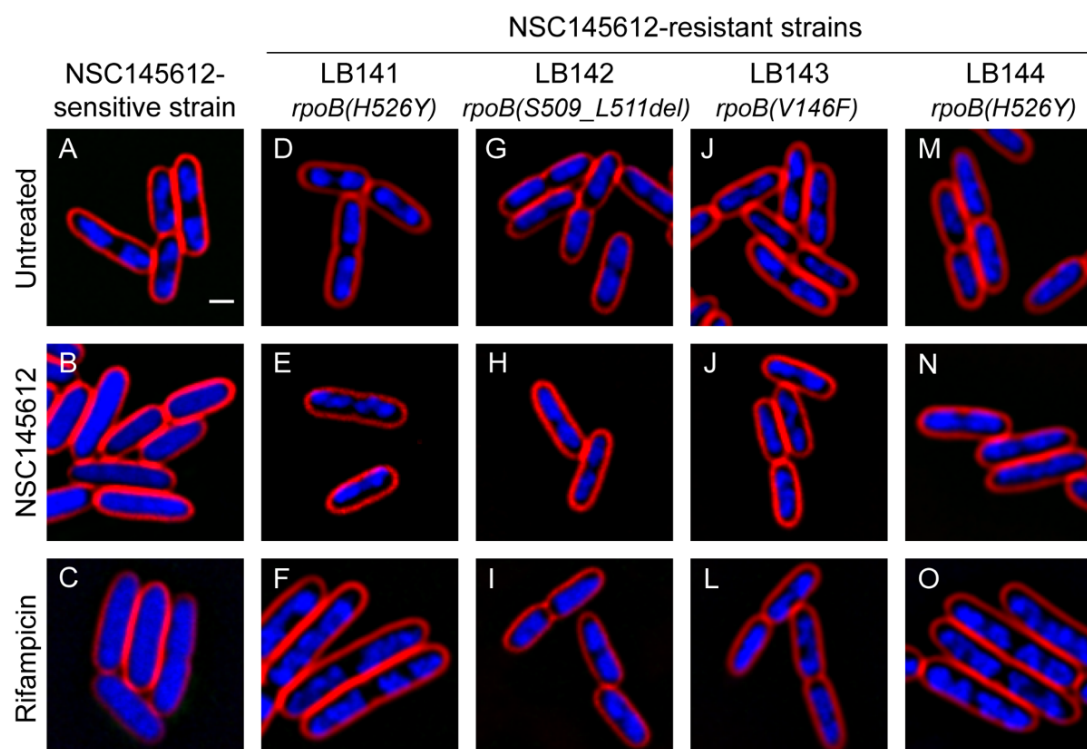

63

64

65 **FIG S3 NSC145612-sensitive and -resistant *E. coli* cells treated with NSC145612 and**66 **Rifampicin**67 (*A–C*) NSC145612-sensitive strain. (*D–O*) NSC145612-resistant strains with *rpoB* mutations

68 indicated. Bacterial cells were treated with NSC145612 or Rifampicin for 2 hours and then

69 stained with FM4-64 (red) and DAPI (blue). Scale bar represents 1  $\mu\text{m}$ .

70

71

72

73

74

75

76

77

78

79 **Table S1** Complete list of drugs tested in this study

| Antibiotic Class                                                 | Antibiotic Name   | MIC ( $\mu\text{g/ml}$ ) | Target                                                                    |
|------------------------------------------------------------------|-------------------|--------------------------|---------------------------------------------------------------------------|
| <b>Drugs tested in <i>Acinetobacter baumannii</i> ATCC 19606</b> |                   |                          |                                                                           |
| <b>Protein Synthesis Inhibitors</b>                              |                   |                          |                                                                           |
| Aminoglycoside                                                   | Amikacin          | 20                       | 30s ribosome (promote mistranslation)                                     |
|                                                                  | Gentamicin        | 28                       | 30s ribosome (promote mistranslation)                                     |
|                                                                  | Kanamycin         | 10                       | 30s ribosome (promote mistranslation)                                     |
|                                                                  | Streptomycin      | >112                     | 30s ribosome (promote mistranslation)                                     |
|                                                                  | Tobramycin        | 7                        | 30s ribosome (inhibit initiation complex formation)                       |
| Amphenicols                                                      | Chloramphenicol   | 50                       | 50s ribosome (inhibit peptidyl transferase)                               |
| Macrolide                                                        | Azithromycin      | 16                       | 50S ribosome (interfere aminoacyl translocation)                          |
| Tetracycline                                                     | Minocycline       | 0.75                     | 30S ribosome (inhibit aminoacyl tRNA binding)                             |
|                                                                  | Tetracycline      | 0.25                     | 30S ribosome (inhibit aminoacyl tRNA binding)                             |
|                                                                  | Tigecycline       | 2                        | 30S ribosome (inhibit aminoacyl tRNA binding)                             |
| <b>RNA Transcription Inhibitor</b>                               |                   |                          |                                                                           |
| Rifamycin                                                        | Rifampicin        | 1                        | DNA-dependent RNA polymerase                                              |
| <b>Cell Wall Synthesis Inhibitors</b>                            |                   |                          |                                                                           |
| Penicillin                                                       | Ampicillin        | >112                     | Penicillin-binding proteins (PBPs)                                        |
|                                                                  | Amoxicillin       | >112                     | Penicillin-binding proteins (PBPs)                                        |
|                                                                  | Mecillinam        | >112                     | Penicillin-binding proteins (PBPs)                                        |
|                                                                  | Piperacillin      | 16                       | Penicillin-binding proteins (PBPs)                                        |
| Carbapenem                                                       | Meropenem         | 1                        | Penicillin-binding proteins (PBPs)                                        |
| Others                                                           | Fosfomycin        | >112                     | UDP-N-acetylglucosamine enolpyruvyl transferase (MurA)                    |
|                                                                  | D-Cycloserine     | >112                     | D-Ala-D-Ala terminal of peptidoglycan                                     |
| <b>Membrane Active Compounds</b>                                 |                   |                          |                                                                           |
| Polymyxin                                                        | Colistin          | 1                        | Lipopolysaccharide (LPS)                                                  |
| Oxidative Phosphorylation uncoupling Agents                      | 2,4-Dinitrophenol | >112                     | Energy poisoning agents                                                   |
| <b>Lipid Synthesis Inhibitors</b>                                |                   |                          |                                                                           |
| Polychloro Phenoxy Phenols                                       | Triclosan         | 0.2                      | Bacterial enoyl-acyl carrier protein reductase enzyme (ENR: FabI product) |
| <b>Tested compound</b>                                           | NSC145612         | 25 $\mu\text{M}$         |                                                                           |
| <b>Drugs tested in <i>Acinetobacter baumannii</i> ATCC 17978</b> |                   |                          |                                                                           |
| <b>DNA Synthesis Inhibitor</b>                                   |                   |                          |                                                                           |
| Fluoroquinolone                                                  | Ciprofloxacin     | 1                        | DNA gyrase A                                                              |

80

81

82 **Table S2** *A. baumannii* cell morphological measurements used in cytological profiling. All  
 83 values are in mean  $\pm$  SEM for 3 independent experiments.

| Antibiotics     | Membrane length,<br>$\mu\text{m}$ | DNA length,<br>$\mu\text{m}$ | Membrane width,<br>$\mu\text{m}$ | DNA width,<br>$\mu\text{m}$ |
|-----------------|-----------------------------------|------------------------------|----------------------------------|-----------------------------|
| Amikacin        | 2.568 $\pm$ 0.023                 | 2.378 $\pm$ 0.031            | 1.380 $\pm$ 0.000                | 1.182 $\pm$ 0.005           |
| Azithromycin    | 2.368 $\pm$ 0.116                 | 1.726 $\pm$ 0.020            | 0.922 $\pm$ 0.056                | 1.009 $\pm$ 0.025           |
| Chloramphenicol | 2.402 $\pm$ 0.033                 | 1.892 $\pm$ 0.025            | 0.917 $\pm$ 0.029                | 1.068 $\pm$ 0.011           |
| Colistin        | 2.107 $\pm$ 0.077                 | 2.164 $\pm$ 0.175            | 1.039 $\pm$ 0.001                | 1.043 $\pm$ 0.046           |
| Gentamicin      | 2.606 $\pm$ 0.033                 | 2.520 $\pm$ 0.037            | 1.251 $\pm$ 0.009                | 1.168 $\pm$ 0.014           |
| Kanamycin       | 2.572 $\pm$ 0.042                 | 2.401 $\pm$ 0.041            | 1.325 $\pm$ 0.035                | 1.142 $\pm$ 0.023           |
| Meropenem       | 3.596 $\pm$ 0.149                 | 3.578 $\pm$ 0.149            | 2.626 $\pm$ 0.040                | 2.577 $\pm$ 0.038           |
| Minocycline     | 2.392 $\pm$ 0.131                 | 2.179 $\pm$ 0.082            | 0.961 $\pm$ 0.032                | 1.120 $\pm$ 0.012           |
| Piperacillin    | 14.034 $\pm$ 1.005                | 13.809 $\pm$ 0.950           | 4.985 $\pm$ 0.988                | 4.878 $\pm$ 0.937           |
| Rifampicin      | 2.680 $\pm$ 0.012                 | 2.361 $\pm$ 0.077            | 1.066 $\pm$ 0.020                | 1.123 $\pm$ 0.029           |
| Tetracycline    | 2.816 $\pm$ 0.056                 | 2.006 $\pm$ 0.015            | 1.175 $\pm$ 0.012                | 1.155 $\pm$ 0.022           |
| Tigecycline     | 2.667 $\pm$ 0.114                 | 2.104 $\pm$ 0.078            | 1.122 $\pm$ 0.069                | 1.237 $\pm$ 0.034           |
| Tobramycin      | 2.648 $\pm$ 0.058                 | 2.548 $\pm$ 0.059            | 1.230 $\pm$ 0.033                | 1.145 $\pm$ 0.021           |
| Triclosan       | 2.807 $\pm$ 0.079                 | 2.742 $\pm$ 0.083            | 1.261 $\pm$ 0.031                | 1.216 $\pm$ 0.026           |
| NSC145612       | 2.889 $\pm$ 0.057                 | 2.469 $\pm$ 0.060            | 1.101 $\pm$ 0.019                | 1.150 $\pm$ 0.019           |
| Untreated       | 2.962 $\pm$ 0.053                 | 2.953 $\pm$ 0.023            | 0.987 $\pm$ 0.041                | 1.084 $\pm$ 0.055           |
| Ciprofloxacin*  | 4.776 $\pm$ 0.177                 | 4.041 $\pm$ 0.097            | 1.050 $\pm$ 0.015                | 1.040 $\pm$ 0.026           |
| Untreated*      | 2.583 $\pm$ 0.024                 | 2.639 $\pm$ 0.053            | 0.819 $\pm$ 0.013                | 0.934 $\pm$ 0.020           |

  

| Antibiotics     | Membrane area,<br>$\mu\text{m}^2$ | DNA area,<br>$\mu\text{m}^2$ | Membrane perimeter,<br>$\mu\text{m}$ | DNA perimeter,<br>$\mu\text{m}$ |
|-----------------|-----------------------------------|------------------------------|--------------------------------------|---------------------------------|
| Amikacin        | 2.743 $\pm$ 0.023                 | 2.175 $\pm$ 0.037            | 7.002 $\pm$ 0.056                    | 6.118 $\pm$ 0.061               |
| Azithromycin    | 1.552 $\pm$ 0.168                 | 1.378 $\pm$ 0.042            | 6.879 $\pm$ 0.753                    | 4.857 $\pm$ 0.103               |
| Chloramphenicol | 1.602 $\pm$ 0.022                 | 1.557 $\pm$ 0.041            | 6.256 $\pm$ 0.125                    | 5.173 $\pm$ 0.068               |
| Colistin        | 1.618 $\pm$ 0.054                 | 1.703 $\pm$ 0.196            | 5.567 $\pm$ 0.137                    | 7.169 $\pm$ 0.296               |
| Gentamicin      | 2.496 $\pm$ 0.050                 | 2.263 $\pm$ 0.061            | 6.958 $\pm$ 0.060                    | 6.405 $\pm$ 0.078               |
| Kanamycin       | 2.636 $\pm$ 0.101                 | 2.116 $\pm$ 0.065            | 6.952 $\pm$ 0.137                    | 6.142 $\pm$ 0.125               |
| Meropenem       | 7.616 $\pm$ 0.460                 | 7.431 $\pm$ 0.454            | 11.866 $\pm$ 0.645                   | 12.075 $\pm$ 0.666              |
| Minocycline     | 1.658 $\pm$ 0.134                 | 1.851 $\pm$ 0.073            | 6.447 $\pm$ 0.374                    | 5.948 $\pm$ 0.142               |
| Piperacillin    | 26.189 $\pm$ 9.390                | 27.101 $\pm$ 10.523          | 70.243 $\pm$ 24.863                  | 62.659 $\pm$ 18.868             |
| Rifampicin      | 2.117 $\pm$ 0.049                 | 2.076 $\pm$ 0.116            | 6.637 $\pm$ 0.072                    | 6.671 $\pm$ 0.148               |
| Tetracycline    | 2.447 $\pm$ 0.077                 | 1.753 $\pm$ 0.041            | 8.112 $\pm$ 0.503                    | 5.839 $\pm$ 0.133               |
| Tigecycline     | 2.235 $\pm$ 0.214                 | 2.037 $\pm$ 0.142            | 7.645 $\pm$ 0.280                    | 6.195 $\pm$ 0.130               |
| Tobramycin      | 2.493 $\pm$ 0.124                 | 2.240 $\pm$ 0.094            | 6.972 $\pm$ 0.179                    | 6.393 $\pm$ 0.141               |
| Triclosan       | 2.627 $\pm$ 0.119                 | 2.457 $\pm$ 0.114            | 7.788 $\pm$ 0.154                    | 7.626 $\pm$ 0.099               |
| NSC145612       | 2.353 $\pm$ 0.049                 | 2.216 $\pm$ 0.079            | 7.186 $\pm$ 0.150                    | 7.061 $\pm$ 0.167               |
| Untreated       | 2.106 $\pm$ 0.154                 | 2.390 $\pm$ 0.168            | 7.379 $\pm$ 0.279                    | 7.451 $\pm$ 0.150               |
| Ciprofloxacin*  | 3.219 $\pm$ 0.100                 | 3.102 $\pm$ 0.137            | 11.457 $\pm$ 0.295                   | 9.727 $\pm$ 0.185               |
| Untreated*      | 1.500 $\pm$ 0.015                 | 1.863 $\pm$ 0.079            | 6.247 $\pm$ 0.070                    | 6.351 $\pm$ 0.117               |

| Antibiotics     | Membrane form factor | DNA form factor   | Membrane compactness, $\mu\text{m}$ | DNA compactness, $\mu\text{m}$ |
|-----------------|----------------------|-------------------|-------------------------------------|--------------------------------|
| Amikacin        | 0.711 $\pm$ 0.005    | 0.732 $\pm$ 0.003 | 0.060 $\pm$ 0.000                   | 0.063 $\pm$ 0.000              |
| Azithromycin    | 0.468 $\pm$ 0.054    | 0.706 $\pm$ 0.008 | 0.082 $\pm$ 0.001                   | 0.060 $\pm$ 0.000              |
| Chloramphenicol | 0.536 $\pm$ 0.013    | 0.729 $\pm$ 0.013 | 0.082 $\pm$ 0.002                   | 0.061 $\pm$ 0.001              |
| Colistin        | 0.682 $\pm$ 0.010    | 0.418 $\pm$ 0.037 | 0.067 $\pm$ 0.002                   | 0.075 $\pm$ 0.002              |
| Gentamicin      | 0.655 $\pm$ 0.005    | 0.695 $\pm$ 0.003 | 0.066 $\pm$ 0.000                   | 0.067 $\pm$ 0.001              |
| Kanamycin       | 0.688 $\pm$ 0.001    | 0.704 $\pm$ 0.006 | 0.062 $\pm$ 0.000                   | 0.066 $\pm$ 0.000              |
| Meropenem       | 0.721 $\pm$ 0.017    | 0.679 $\pm$ 0.020 | 0.053 $\pm$ 0.001                   | 0.054 $\pm$ 0.001              |
| Minocycline     | 0.526 $\pm$ 0.020    | 0.661 $\pm$ 0.008 | 0.079 $\pm$ 0.002                   | 0.066 $\pm$ 0.001              |
| Piperacillin    | 0.176 $\pm$ 0.016    | 0.165 $\pm$ 0.017 | 0.240 $\pm$ 0.027                   | 0.243 $\pm$ 0.029              |
| Rifampicin      | 0.621 $\pm$ 0.002    | 0.567 $\pm$ 0.011 | 0.076 $\pm$ 0.001                   | 0.068 $\pm$ 0.000              |
| Tetracycline    | 0.523 $\pm$ 0.035    | 0.635 $\pm$ 0.014 | 0.075 $\pm$ 0.001                   | 0.065 $\pm$ 0.001              |
| Tigecycline     | 0.487 $\pm$ 0.035    | 0.652 $\pm$ 0.016 | 0.076 $\pm$ 0.003                   | 0.062 $\pm$ 0.000              |
| Tobramycin      | 0.650 $\pm$ 0.002    | 0.689 $\pm$ 0.002 | 0.067 $\pm$ 0.000                   | 0.069 $\pm$ 0.000              |
| Triclosan       | 0.566 $\pm$ 0.005    | 0.563 $\pm$ 0.029 | 0.070 $\pm$ 0.001                   | 0.072 $\pm$ 0.001              |
| NSC145612       | 0.592 $\pm$ 0.012    | 0.536 $\pm$ 0.011 | 0.080 $\pm$ 0.002                   | 0.070 $\pm$ 0.000              |
| Untreated       | 0.509 $\pm$ 0.023    | 0.552 $\pm$ 0.010 | 0.091 $\pm$ 0.004                   | 0.081 $\pm$ 0.003              |
| Ciprofloxacin*  | 0.327 $\pm$ 0.009    | 0.429 $\pm$ 0.004 | 0.154 $\pm$ 0.007                   | 0.111 $\pm$ 0.001              |
| Untreated*      | 0.524 $\pm$ 0.004    | 0.594 $\pm$ 0.005 | 0.097 $\pm$ 0.002                   | 0.082 $\pm$ 0.000              |

| Antibiotics     | Membrane extent, $\mu\text{m}$ | DNA extent, $\mu\text{m}$ | Membrane eccentricity, $\mu\text{m}$ | DNA eccentricity, $\mu\text{m}$ |
|-----------------|--------------------------------|---------------------------|--------------------------------------|---------------------------------|
| Amikacin        | 0.032 $\pm$ 0.000              | 0.032 $\pm$ 0.000         | 0.039 $\pm$ 0.000                    | 0.040 $\pm$ 0.000               |
| Azithromycin    | 0.027 $\pm$ 0.001              | 0.032 $\pm$ 0.000         | 0.043 $\pm$ 0.000                    | 0.036 $\pm$ 0.000               |
| Chloramphenicol | 0.027 $\pm$ 0.000              | 0.032 $\pm$ 0.000         | 0.043 $\pm$ 0.001                    | 0.037 $\pm$ 0.000               |
| Colistin        | 0.031 $\pm$ 0.000              | 0.027 $\pm$ 0.001         | 0.038 $\pm$ 0.001                    | 0.039 $\pm$ 0.001               |
| Gentamicin      | 0.031 $\pm$ 0.000              | 0.031 $\pm$ 0.000         | 0.040 $\pm$ 0.000                    | 0.041 $\pm$ 0.000               |
| Kanamycin       | 0.032 $\pm$ 0.000              | 0.032 $\pm$ 0.000         | 0.039 $\pm$ 0.000                    | 0.040 $\pm$ 0.000               |
| Meropenem       | 0.034 $\pm$ 0.000              | 0.034 $\pm$ 0.000         | 0.028 $\pm$ 0.001                    | 0.029 $\pm$ 0.001               |
| Minocycline     | 0.027 $\pm$ 0.001              | 0.031 $\pm$ 0.000         | 0.042 $\pm$ 0.000                    | 0.038 $\pm$ 0.001               |
| Piperacillin    | 0.013 $\pm$ 0.000              | 0.013 $\pm$ 0.000         | 0.044 $\pm$ 0.001                    | 0.044 $\pm$ 0.001               |
| Rifampicin      | 0.043 $\pm$ 0.000              | 0.041 $\pm$ 0.000         | 0.029 $\pm$ 0.000                    | 0.030 $\pm$ 0.000               |
| Tetracycline    | 0.028 $\pm$ 0.000              | 0.031 $\pm$ 0.000         | 0.042 $\pm$ 0.000                    | 0.036 $\pm$ 0.000               |
| Tigecycline     | 0.028 $\pm$ 0.001              | 0.032 $\pm$ 0.000         | 0.042 $\pm$ 0.001                    | 0.036 $\pm$ 0.001               |
| Tobramycin      | 0.031 $\pm$ 0.000              | 0.031 $\pm$ 0.000         | 0.041 $\pm$ 0.000                    | 0.041 $\pm$ 0.000               |
| Triclosan       | 0.029 $\pm$ 0.001              | 0.029 $\pm$ 0.001         | 0.041 $\pm$ 0.001                    | 0.041 $\pm$ 0.001               |
| NSC145612       | 0.028 $\pm$ 0.000              | 0.029 $\pm$ 0.000         | 0.043 $\pm$ 0.000                    | 0.040 $\pm$ 0.000               |
| Untreated       | 0.026 $\pm$ 0.001              | 0.027 $\pm$ 0.000         | 0.044 $\pm$ 0.000                    | 0.044 $\pm$ 0.000               |
| Ciprofloxacin*  | 0.018 $\pm$ 0.001              | 0.023 $\pm$ 0.000         | 0.046 $\pm$ 0.000                    | 0.046 $\pm$ 0.000               |
| Untreated*      | 0.026 $\pm$ 0.000              | 0.028 $\pm$ 0.000         | 0.045 $\pm$ 0.000                    | 0.044 $\pm$ 0.000               |

| Antibiotics     | Membrane maximum ferret diameter, $\mu\text{m}$ | DNA maximum ferret diameter, $\mu\text{m}$ | Membrane minimum ferret diameter, $\mu\text{m}$ | DNA minimum ferret diameter, $\mu\text{m}$ |
|-----------------|-------------------------------------------------|--------------------------------------------|-------------------------------------------------|--------------------------------------------|
| Amikacin        | 2.456 $\pm$ 0.021                               | 2.247 $\pm$ 0.030                          | 1.352 $\pm$ 0.002                               | 1.147 $\pm$ 0.005                          |
| Azithromycin    | 2.206 $\pm$ 0.125                               | 1.658 $\pm$ 0.018                          | 0.940 $\pm$ 0.067                               | 0.990 $\pm$ 0.027                          |
| Chloramphenicol | 2.248 $\pm$ 0.012                               | 1.801 $\pm$ 0.025                          | 0.922 $\pm$ 0.034                               | 1.046 $\pm$ 0.010                          |
| Colistin        | 1.970 $\pm$ 0.067                               | 2.070 $\pm$ 0.157                          | 1.028 $\pm$ 0.003                               | 1.076 $\pm$ 0.047                          |
| Gentamicin      | 2.464 $\pm$ 0.028                               | 2.362 $\pm$ 0.030                          | 1.236 $\pm$ 0.007                               | 1.141 $\pm$ 0.013                          |
| Kanamycin       | 2.453 $\pm$ 0.040                               | 2.258 $\pm$ 0.039                          | 1.302 $\pm$ 0.034                               | 1.113 $\pm$ 0.023                          |
| Meropenem       | 3.548 $\pm$ 0.134                               | 3.521 $\pm$ 0.133                          | 2.632 $\pm$ 0.048                               | 2.585 $\pm$ 0.046                          |
| Minocycline     | 2.262 $\pm$ 0.119                               | 2.057 $\pm$ 0.071                          | 0.966 $\pm$ 0.036                               | 1.110 $\pm$ 0.014                          |
| Piperacillin    | 13.023 $\pm$ 1.188                              | 12.914 $\pm$ 1.170                         | 5.252 $\pm$ 1.154                               | 5.191 $\pm$ 1.142                          |
| Rifampicin      | 2.469 $\pm$ 0.020                               | 2.250 $\pm$ 0.069                          | 1.052 $\pm$ 0.020                               | 1.117 $\pm$ 0.027                          |
| Tetracycline    | 2.698 $\pm$ 0.045                               | 1.909 $\pm$ 0.022                          | 1.181 $\pm$ 0.013                               | 1.150 $\pm$ 0.026                          |
| Tigecycline     | 2.523 $\pm$ 0.095                               | 2.039 $\pm$ 0.076                          | 1.150 $\pm$ 0.066                               | 1.226 $\pm$ 0.029                          |
| Tobramycin      | 2.503 $\pm$ 0.057                               | 2.386 $\pm$ 0.055                          | 1.220 $\pm$ 0.030                               | 1.122 $\pm$ 0.018                          |
| Triclosan       | 2.654 $\pm$ 0.062                               | 2.580 $\pm$ 0.057                          | 1.277 $\pm$ 0.032                               | 1.230 $\pm$ 0.024                          |
| NSC145612       | 2.677 $\pm$ 0.046                               | 2.367 $\pm$ 0.058                          | 1.097 $\pm$ 0.023                               | 1.144 $\pm$ 0.020                          |
| Untreated       | 2.731 $\pm$ 0.056                               | 2.765 $\pm$ 0.035                          | 1.004 $\pm$ 0.043                               | 1.094 $\pm$ 0.056                          |
| Ciprofloxacin*  | 4.567 $\pm$ 0.188                               | 3.821 $\pm$ 0.089                          | 1.125 $\pm$ 0.013                               | 1.071 $\pm$ 0.029                          |
| Untreated*      | 2.390 $\pm$ 0.017                               | 2.456 $\pm$ 0.048                          | 0.815 $\pm$ 0.012                               | 0.921 $\pm$ 0.018                          |

| Antibiotics     | Membrane maximum radius, $\mu\text{m}$ | DNA maximum radius, $\mu\text{m}$ | Membrane mean radius, $\mu\text{m}$ | DNA mean radius, $\mu\text{m}$ |
|-----------------|----------------------------------------|-----------------------------------|-------------------------------------|--------------------------------|
| Amikacin        | 0.656 $\pm$ 0.002                      | 0.566 $\pm$ 0.003                 | 0.268 $\pm$ 0.001                   | 0.236 $\pm$ 0.002              |
| Azithromycin    | 0.407 $\pm$ 0.020                      | 0.473 $\pm$ 0.009                 | 0.167 $\pm$ 0.008                   | 0.192 $\pm$ 0.002              |
| Chloramphenicol | 0.424 $\pm$ 0.008                      | 0.499 $\pm$ 0.008                 | 0.178 $\pm$ 0.001                   | 0.203 $\pm$ 0.003              |
| Colistin        | 0.497 $\pm$ 0.002                      | 0.429 $\pm$ 0.032                 | 0.203 $\pm$ 0.001                   | 0.169 $\pm$ 0.013              |
| Gentamicin      | 0.587 $\pm$ 0.006                      | 0.554 $\pm$ 0.008                 | 0.242 $\pm$ 0.002                   | 0.232 $\pm$ 0.003              |
| Kanamycin       | 0.624 $\pm$ 0.015                      | 0.542 $\pm$ 0.010                 | 0.256 $\pm$ 0.005                   | 0.227 $\pm$ 0.004              |
| Meropenem       | 1.193 $\pm$ 0.007                      | 1.138 $\pm$ 0.005                 | 0.438 $\pm$ 0.002                   | 0.418 $\pm$ 0.001              |
| Minocycline     | 0.444 $\pm$ 0.014                      | 0.519 $\pm$ 0.005                 | 0.183 $\pm$ 0.005                   | 0.210 $\pm$ 0.002              |
| Piperacillin    | 0.568 $\pm$ 0.021                      | 0.688 $\pm$ 0.111                 | 0.223 $\pm$ 0.003                   | 0.238 $\pm$ 0.019              |
| Rifampicin      | 0.502 $\pm$ 0.008                      | 0.509 $\pm$ 0.014                 | 0.215 $\pm$ 0.003                   | 0.209 $\pm$ 0.007              |
| Tetracycline    | 0.538 $\pm$ 0.010                      | 0.508 $\pm$ 0.002                 | 0.219 $\pm$ 0.007                   | 0.203 $\pm$ 0.001              |
| Tigecycline     | 0.510 $\pm$ 0.035                      | 0.566 $\pm$ 0.022                 | 0.206 $\pm$ 0.014                   | 0.225 $\pm$ 0.010              |
| Tobramycin      | 0.583 $\pm$ 0.015                      | 0.549 $\pm$ 0.009                 | 0.241 $\pm$ 0.006                   | 0.230 $\pm$ 0.004              |
| Triclosan       | 0.596 $\pm$ 0.015                      | 0.569 $\pm$ 0.017                 | 0.238 $\pm$ 0.005                   | 0.227 $\pm$ 0.008              |
| NSC145612       | 0.511 $\pm$ 0.007                      | 0.517 $\pm$ 0.009                 | 0.218 $\pm$ 0.002                   | 0.210 $\pm$ 0.004              |
| Untreated       | 0.453 $\pm$ 0.022                      | 0.500 $\pm$ 0.030                 | 0.193 $\pm$ 0.008                   | 0.213 $\pm$ 0.009              |
| Ciprofloxacin*  | 0.444 $\pm$ 0.006                      | 0.497 $\pm$ 0.013                 | 0.183 $\pm$ 0.001                   | 0.208 $\pm$ 0.005              |
| Untreated*      | 0.369 $\pm$ 0.004                      | 0.446 $\pm$ 0.009                 | 0.164 $\pm$ 0.002                   | 0.194 $\pm$ 0.004              |



| Antibiotics     | Membrane SytoxG intensity | DNA SytoxG intensity | Membrane DAPI intensity | DNA DAPI intensity |
|-----------------|---------------------------|----------------------|-------------------------|--------------------|
| Amikacin        | 578.357 ± 155.218         | 699.618 ± 194.658    | 3250.040 ± 300.305      | 3917.849 ± 342.691 |
| Azithromycin    | 32.091 ± 9.186            | 123.453 ± 35.671     | 390.001 ± 75.489        | 571.737 ± 56.254   |
| Chloramphenicol | 100.954 ± 33.485          | 126.052 ± 30.781     | 1387.209 ± 163.185      | 1324.258 ± 148.374 |
| Colistin        | 20.746 ± 8.193            | 12.181 ± 0.581       | 232.524 ± 78.429        | 134.082 ± 40.494   |
| Gentamicin      | 1689.281 ± 207.195        | 1915.971 ± 213.632   | 3794.358 ± 198.253      | 4094.632 ± 212.617 |
| Kanamycin       | 194.450 ± 42.911          | 243.196 ± 53.812     | 2597.964 ± 169.715      | 3099.838 ± 219.835 |
| Meropenem       | 17.774 ± 3.458            | 18.377 ± 3.675       | 253.114 ± 18.843        | 259.744 ± 19.356   |
| Minocycline     | 80.247 ± 19.330           | 122.181 ± 44.699     | 1017.185 ± 127.827      | 870.702 ± 108.501  |
| Piperacillin    | 10.674 ± 1.163            | 10.896 ± 1.167       | 83.445 ± 21.820         | 86.192 ± 22.429    |
| Rifampicin      | 16.831 ± 4.743            | 10.566 ± 3.626       | 346.194 ± 23.619        | 256.341 ± 31.280   |
| Tetracycline    | 35.513 ± 15.973           | 69.890 ± 43.822      | 967.186 ± 222.483       | 711.432 ± 140.700  |
| Tigecycline     | 28.659 ± 7.483            | 88.736 ± 31.431      | 746.679 ± 234.490       | 667.615 ± 103.950  |
| Tobramycin      | 324.585 ± 36.373          | 346.825 ± 42.551     | 2977.628 ± 107.192      | 3222.385 ± 103.431 |
| Triclosan       | 44.713 ± 17.272           | 47.485 ± 17.983      | 209.222 ± 49.015        | 220.716 ± 50.794   |
| NSC145612       | 9.749 ± 1.729             | 10.246 ± 2.630       | 84.173 ± 16.059         | 70.588 ± 7.783     |
| Untreated       | 8.678 ± 1.711             | 9.412 ± 1.992        | 153.049 ± 28.475        | 125.433 ± 5.365    |
| Ciprofloxacin*  | 17.132 ± 3.196            | 66.688 ± 18.549      | 340.012 ± 47.552        | 516.237 ± 69.061   |
| Untreated*      | 12.988 ± 0.496            | 17.188 ± 0.913       | 340.799 ± 52.214        | 338.023 ± 68.708   |

| Antibiotics     | Membrane SytoxG standard deviation | DNA SytoxG standard deviation | Membrane DAPI standard deviation | DNA DAPI standard deviation |
|-----------------|------------------------------------|-------------------------------|----------------------------------|-----------------------------|
| Amikacin        | 1990.149 ± 355.667                 | 2441.234 ± 442.522            | 1382.508 ± 135.633               | 1339.156 ± 140.078          |
| Azithromycin    | 109.855 ± 40.788                   | 521.860 ± 164.923             | 465.287 ± 139.319                | 521.570 ± 77.253            |
| Chloramphenicol | 245.061 ± 60.031                   | 474.061 ± 49.955              | 1353.291 ± 150.560               | 844.798 ± 62.395            |
| Colistin        | 38.040 ± 28.854                    | 14.734 ± 0.516                | 190.336 ± 59.128                 | 78.099 ± 12.726             |
| Gentamicin      | 3614.032 ± 301.627                 | 4113.161 ± 300.704            | 1490.355 ± 53.410                | 1414.429 ± 48.963           |
| Kanamycin       | 680.368 ± 130.363                  | 864.762 ± 161.275             | 1334.838 ± 99.868                | 1369.386 ± 113.270          |
| Meropenem       | 64.301 ± 11.185                    | 66.984 ± 11.888               | 94.291 ± 7.856                   | 93.357 ± 7.981              |
| Minocycline     | 190.837 ± 72.488                   | 495.425 ± 170.070             | 1193.115 ± 233.061               | 752.888 ± 103.151           |
| Piperacillin    | 5.510 ± 4.810                      | 5.387 ± 4.737                 | 14.054 ± 6.972                   | 12.779 ± 6.177              |
| Rifampicin      | 70.773 ± 32.626                    | 45.649 ± 29.520               | 458.986 ± 82.971                 | 191.886 ± 13.439            |
| Tetracycline    | 102.047 ± 61.103                   | 230.284 ± 147.186             | 1438.949 ± 368.551               | 641.878 ± 37.431            |
| Tigecycline     | 27.001 ± 7.767                     | 262.911 ± 99.135              | 526.550 ± 282.648                | 440.378 ± 92.880            |
| Tobramycin      | 1162.413 ± 163.062                 | 1238.059 ± 175.158            | 1511.326 ± 79.586                | 1454.983 ± 80.529           |
| Triclosan       | 200.386 ± 62.739                   | 219.701 ± 66.931              | 146.329 ± 24.231                 | 160.333 ± 25.120            |
| NSC145612       | 13.138 ± 4.335                     | 19.906 ± 10.102               | 185.832 ± 63.354                 | 137.589 ± 11.611            |
| Untreated       | 22.385 ± 11.013                    | 23.918 ± 10.906               | 72.346 ± 27.259                  | 57.232 ± 17.737             |
| Ciprofloxacin*  | 40.044 ± 15.254                    | 296.997 ± 50.929              | 332.964 ± 33.460                 | 292.093 ± 38.656            |
| Untreated*      | 35.950 ± 5.228                     | 52.768 ± 4.094                | 202.647 ± 21.890                 | 164.566 ± 33.649            |

| Antibiotics     | Membrane solubility, $\mu\text{m}$ | DNA solubility, $\mu\text{m}$ | Parent:Child      | Decondensation    |
|-----------------|------------------------------------|-------------------------------|-------------------|-------------------|
| Amikacin        | 0.045 $\pm$ 0.000                  | 0.045 $\pm$ 0.000             | 1.154 $\pm$ 0.126 | 0.904 $\pm$ 0.082 |
| Azithromycin    | 0.041 $\pm$ 0.001                  | 0.043 $\pm$ 0.000             | 1.165 $\pm$ 0.158 | 1.141 $\pm$ 0.127 |
| Chloramphenicol | 0.042 $\pm$ 0.000                  | 0.044 $\pm$ 0.000             | 0.705 $\pm$ 0.273 | 1.209 $\pm$ 0.174 |
| Colistin        | 0.044 $\pm$ 0.000                  | 0.039 $\pm$ 0.001             | 0.420 $\pm$ 0.076 | 1.057 $\pm$ 0.115 |
| Gentamicin      | 0.044 $\pm$ 0.000                  | 0.044 $\pm$ 0.000             | 0.314 $\pm$ 0.065 | 1.154 $\pm$ 0.149 |
| Kanamycin       | 0.044 $\pm$ 0.000                  | 0.044 $\pm$ 0.000             | 1.036 $\pm$ 0.107 | 1.128 $\pm$ 0.080 |
| Meropenem       | 0.045 $\pm$ 0.000                  | 0.044 $\pm$ 0.000             | 1.111 $\pm$ 0.126 | 0.903 $\pm$ 0.213 |
| Minocycline     | 0.041 $\pm$ 0.000                  | 0.043 $\pm$ 0.000             | 0.892 $\pm$ 0.101 | 0.980 $\pm$ 0.185 |
| Piperacillin    | 0.025 $\pm$ 0.001                  | 0.025 $\pm$ 0.001             | 0.977 $\pm$ 0.167 | 1.103 $\pm$ 0.175 |
| Rifampicin      | 0.043 $\pm$ 0.000                  | 0.042 $\pm$ 0.000             | 0.856 $\pm$ 0.060 | 0.991 $\pm$ 0.076 |
| Tetracycline    | 0.042 $\pm$ 0.000                  | 0.042 $\pm$ 0.000             | 0.655 $\pm$ 0.073 | 0.987 $\pm$ 0.006 |
| Tigecycline     | 0.041 $\pm$ 0.001                  | 0.043 $\pm$ 0.000             | 0.783 $\pm$ 0.294 | 0.991 $\pm$ 0.043 |
| Tobramycin      | 0.044 $\pm$ 0.000                  | 0.044 $\pm$ 0.000             | 0.814 $\pm$ 0.080 | 0.931 $\pm$ 0.019 |
| Triclosan       | 0.043 $\pm$ 0.000                  | 0.042 $\pm$ 0.000             | 0.975 $\pm$ 0.187 | 1.212 $\pm$ 0.313 |
| NSC145612       | 0.043 $\pm$ 0.000                  | 0.041 $\pm$ 0.000             | 0.789 $\pm$ 0.050 | 0.949 $\pm$ 0.028 |
| Untreated       | 0.042 $\pm$ 0.001                  | 0.043 $\pm$ 0.000             | 0.957 $\pm$ 0.169 | 0.913 $\pm$ 0.129 |
| Ciprofloxacin*  | 0.039 $\pm$ 0.000                  | 0.042 $\pm$ 0.000             | 0.770 $\pm$ 0.076 | 0.969 $\pm$ 0.031 |
| Untreated*      | 0.042 $\pm$ 0.000                  | 0.043 $\pm$ 0.000             | 0.969 $\pm$ 0.031 | 1.250 $\pm$ 0.066 |

90

91 \*Data obtained from *A. baumannii* ATCC 17978

92

93

94 **Table S3.** MIC of NSC145612 and rifampicin in *E. coli* strains with and without *rpoB*  
 95 mutations.

| Strains              | <i>rpoB</i> mutations      | MIC                         |                              |
|----------------------|----------------------------|-----------------------------|------------------------------|
|                      |                            | NSC145612 ( $\mu\text{M}$ ) | Rifampicin ( $\mu\text{M}$ ) |
| <i>E. coli</i>       | -                          | 30                          | 9                            |
| <i>E. coli</i> LB141 | <i>rpoB</i> (H526Y)        | >200                        | >200                         |
| <i>E. coli</i> LB142 | <i>rpoB</i> (S509_L511del) | >200                        | >200                         |
| <i>E. coli</i> LB143 | <i>rpoB</i> (V146F)        | >200                        | >200                         |
| <i>E. coli</i> LB144 | <i>rpoB</i> (H526Y)        | >200                        | >200                         |

96

97

98
